# Supplementary material for: Bioinspired hierarchical copper oxide surfaces for rapid dropwise condensation
Source: Royal Society of Chemistry journal article supplement (doi:10.1039/c7ta05087a), 2017-01-01

## Supplementary Material

### Bioinspired Hierarchical Copper Oxide Surfaces for Rapid Dropwise Condensation

Shufen Wang,<sup>a</sup> Minsu Liu,<sup>a</sup> Yuan Feng,<sup>a</sup> Yanru Bu,<sup>a</sup> So Hung Huynh,<sup>b</sup> Tuck Wah Ng,<sup>b</sup> Feng Gu,<sup>c</sup> Aibing Yu<sup>a</sup>, Xuchuan Jiang<sup>a,\*</sup>

#### *Supplementary figures*

**Figure S1.** Microscopic photographs of different photoresist micropillar arrays on the substrate. The diameters of different photoresist micropillars increased gradually.

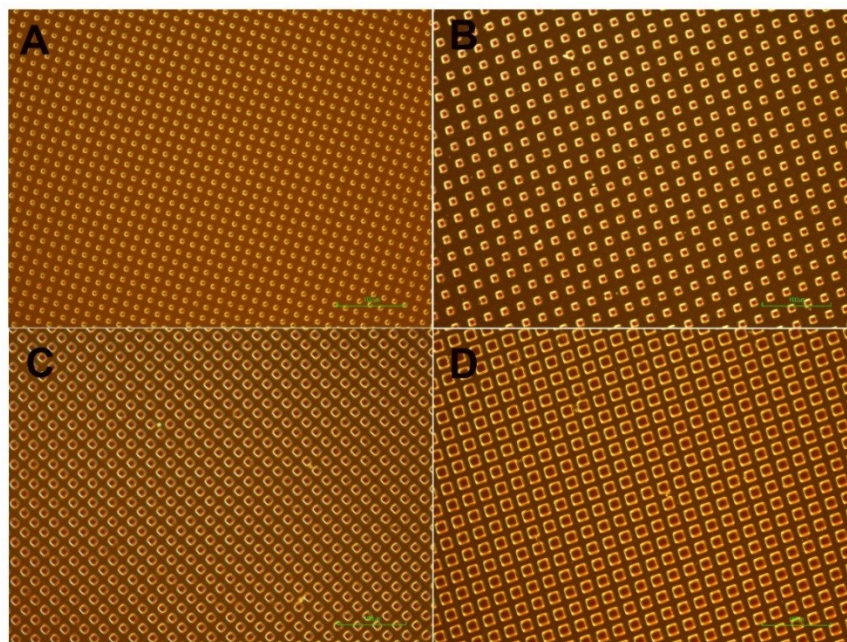

**Figure S2.** SEM image of hierarchical surface obtained by using lower concentration oxidization agents (0.5x) for 7min. The original sample used for treatment is same as Sample G and H.

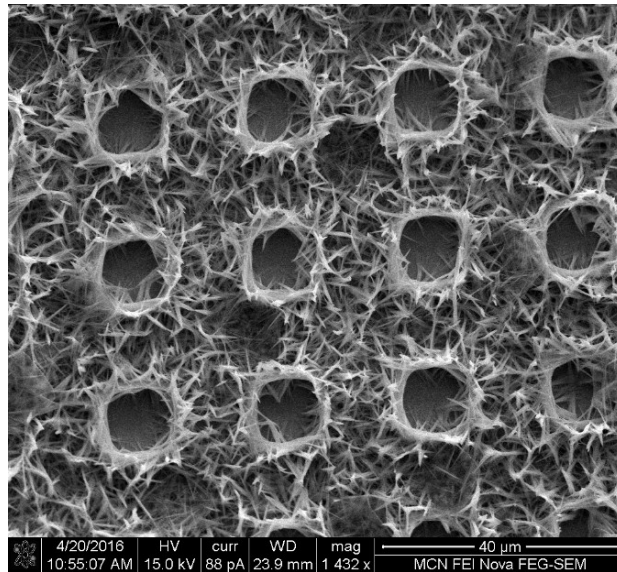

**Figure S3.** XPS spectra of hierarchical surfaces with and without fluorosilane treatment: full spectra (a), and core-level spectra of Cu 2p (b) and C 1s (c).

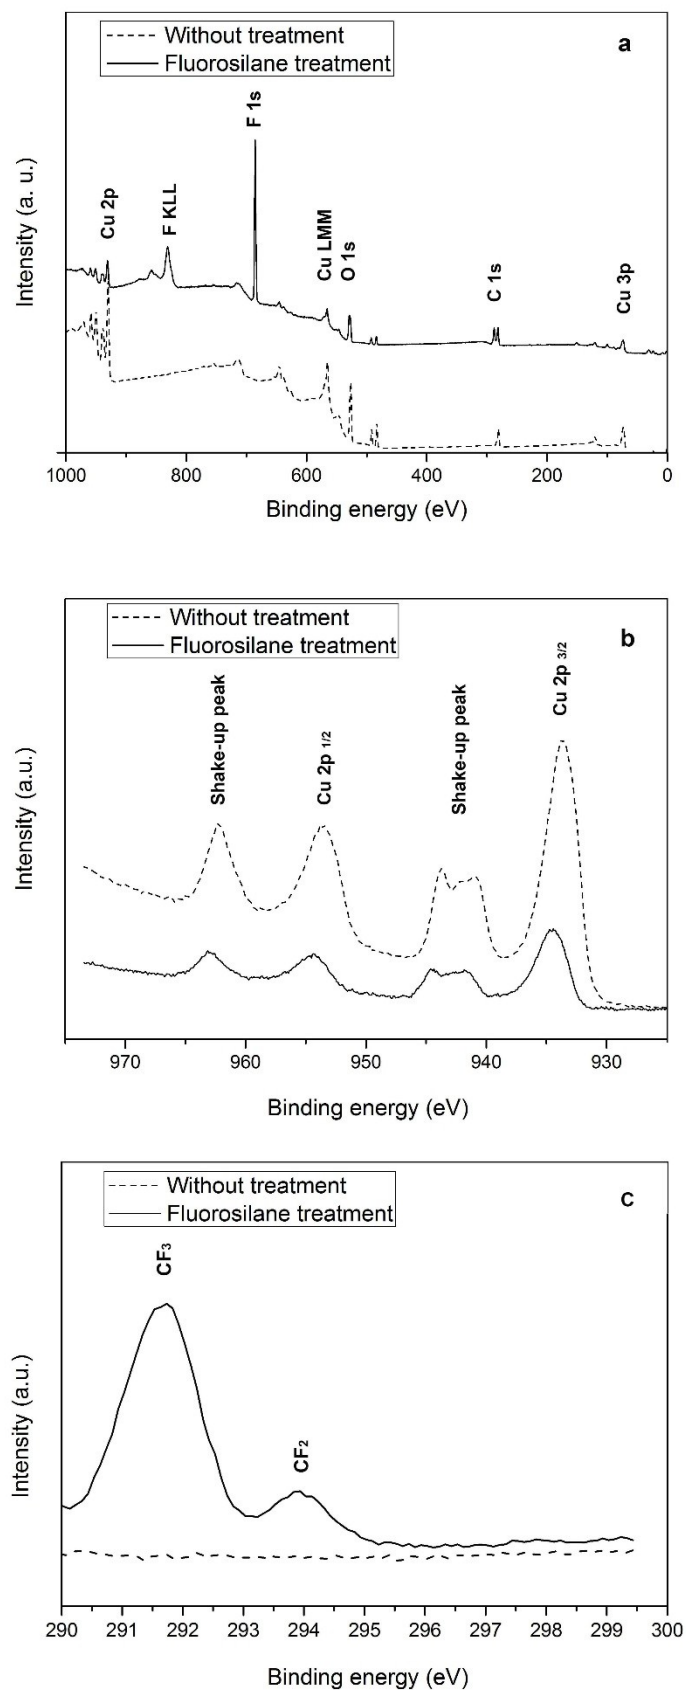

**Fig. S4** Microscopic photographs of the droplets condensed on the nanostructured surface at temperatures of about 2°C.

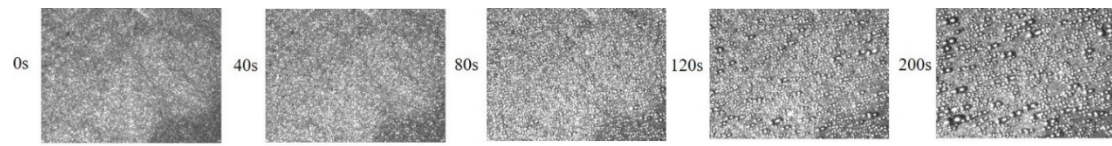

**Figure S5** A water drop falls on the surface due to the gravitation and instantaneously rolls off. In top left each images show the time sequence.

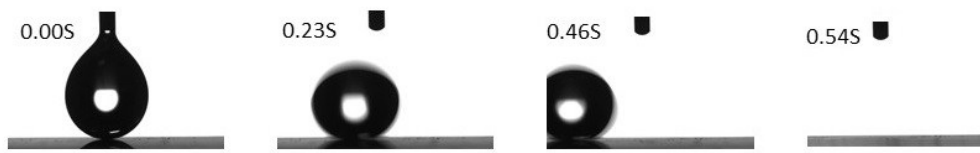

Supplement: c7ta05087a1.pdf [file c7ta05087a1.pdf]
